# Supplementary material for: Multi‐omics analysis of tumor mutational burden combined with prognostic assessment in epithelial ovarian cancer based on TCGA database
Source: PubMed Central journal article supplement (PMC7646107; doi:10.7150/ijms.50491), 2020-10-23
Supplement: ijmsv17p3200s1.pdf [file ijmsv17p3200s1.pdf]

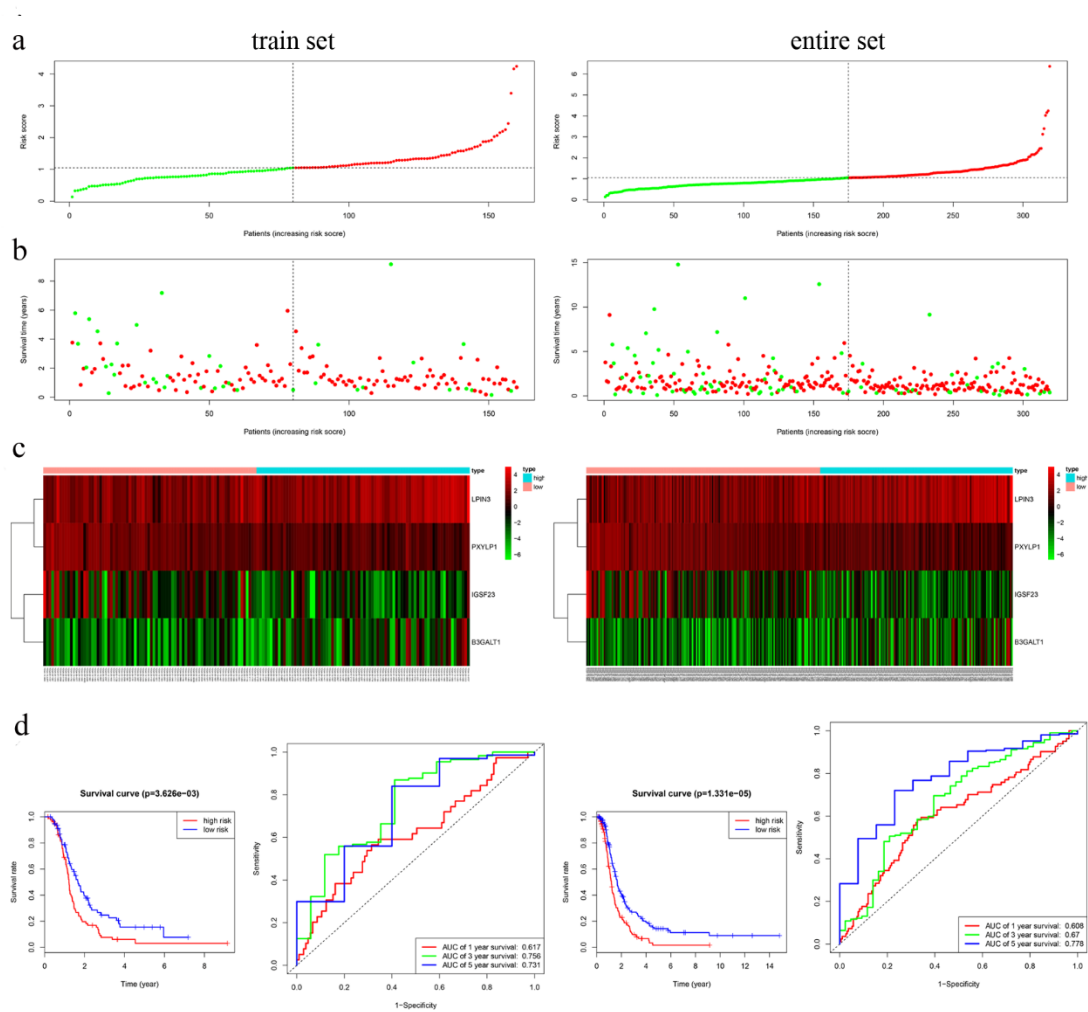

Fig S3 Characteristics of the 4-gene prognostic signature in the training and entire cohort. **a** The risk score of each EOC patient; **b** DFS and survival status of the patients; **c** Heat maps of gene expression profiles; **d** Left panel: Kapan-Meier curves suggested thar EOC patients in low-risk group had much better DFS than those in the high-risk group ( $P < 0.01$ ). **d** Right panel: Time-dependent ROC curves at 1 year, 3 years and 5 years based on the 4-gene signature.

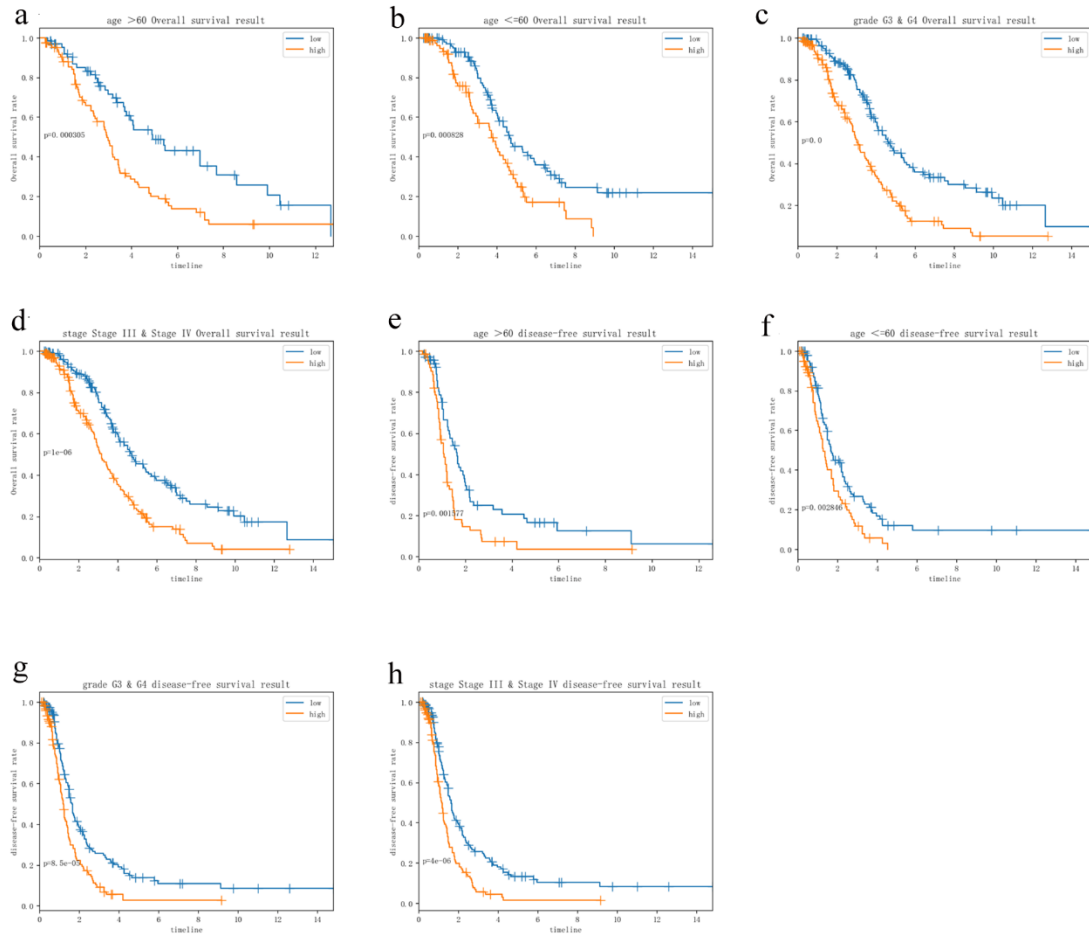

Fig S4 Stratified analysis of the OS- and DFS-signature for EOC patients, which suggested patients with high-risk scores had shorter OS and DFS in subgroups of age  $\leq$  60, age > 60, G3 & G4 and stage III & IV ( $p < 0.05$ ).

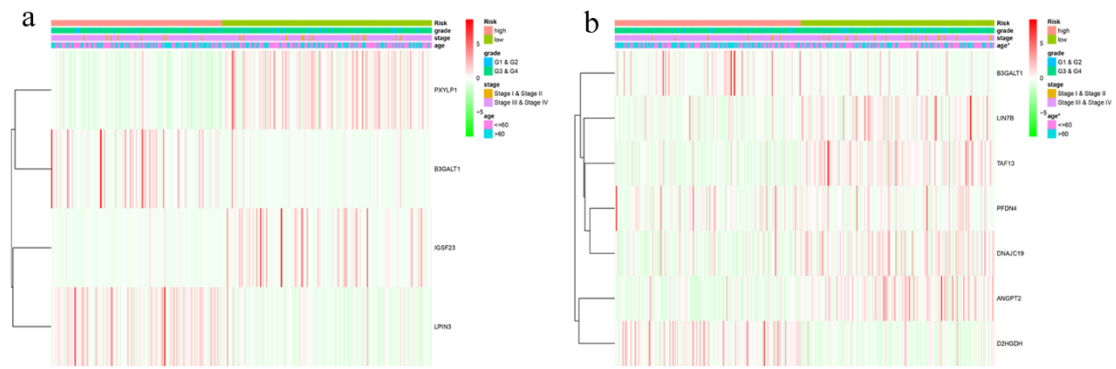

Fig S5 Expression profiles of the prognosis-related genes of OS and DFS in high- and low-risk groups. **a** No significant association was found in DFS model; **b** Differential expression profiles were significantly associated with age in OS model.

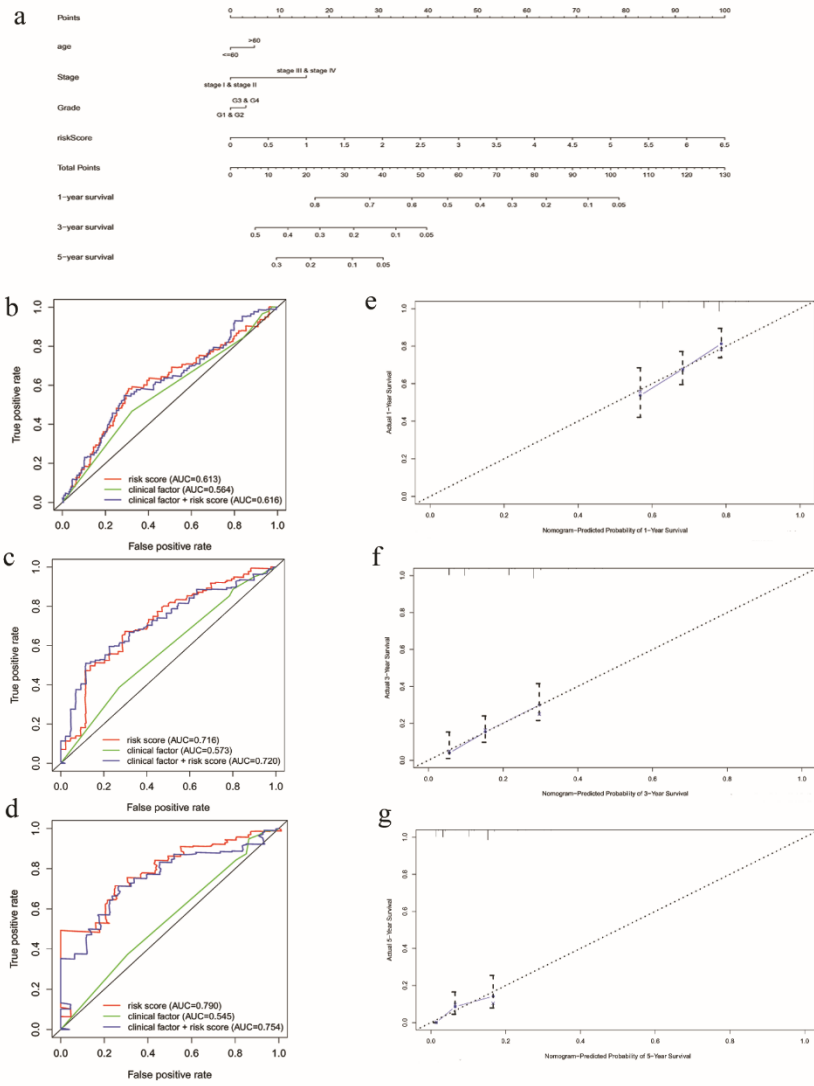

Fig S6 Nomogram to predict DFS in EOC patients. **a** Nomogram based on the 4-gene signature and clinical factors for 1-, 3- and 5-year DFS prediction. **b** Time-dependent ROCs for the nomogram. **c** Calibration plots of the gene-based prognostic model.

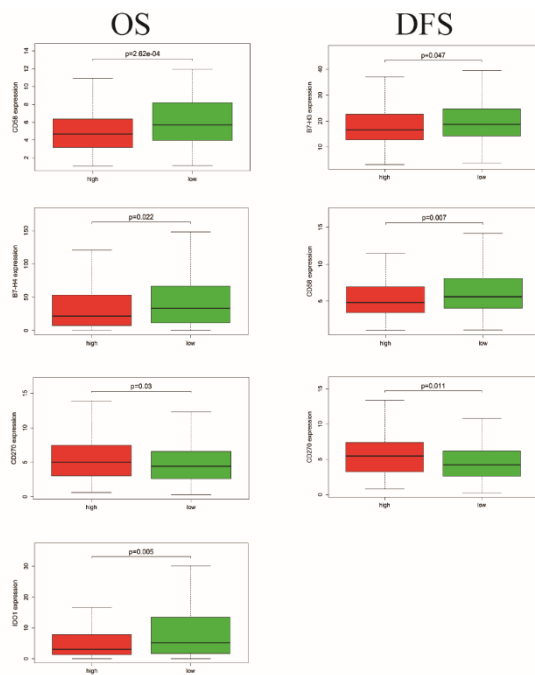

Fig S7 Differential expression profiles of immunomodulators indicated an immunogenic TME in low-risk EOCs. In OS model, the expression of CD 58, B7-H4, IDO1 were significantly higher, but that of CD 270 was lower in low-risk group. In DFS model, the expression of CD 58, B7-H3 were significantly higher, and that of CD 270 was lower in low-risk group.

**Table S1 Clinical characteristics of EOC patients**

| Clinical parameters | Variable             | Total (584) | Percentages (%) |
|---------------------|----------------------|-------------|-----------------|
| Age                 | ≤60                  | 330         | 56.5            |
|                     | >60                  | 254         | 43.49           |
| stage               | Stage I & Stage II   | 50          | 8.56            |
|                     | Stage III & Stage IV | 534         | 91.44           |
| grade               | G1 & G2              | 85          | 14.55           |
|                     | G3 & G4              | 499         | 85.45           |

**Table S2: Univariate and multivariate Cox regression analyses of OS in TCGA training and entire cohort**

| Variables                                          | Univariate analysis |           |             | Multivariate analysis |           |             |
|----------------------------------------------------|---------------------|-----------|-------------|-----------------------|-----------|-------------|
|                                                    | HR                  | 95%CI     | <i>p</i>    | HR                    | 95%CI     | <i>p</i>    |
| <b>TCGA training cohort</b>                        |                     |           |             |                       |           |             |
| Stage (Stage I & Stage II vs Stage III & Stage IV) | 2.41                | 0.59-9.83 | 0.22        | 1.95                  | 0.45-8.38 | 0.37        |
| Grade (G1 & G2 vs G3)                              | 1.63                | 0.84-3.15 | 0.15        | 1.40                  | 0.71-2.79 | 0.33        |
| Age ( $\leq 60$ vs $> 60$ )                        | 1.32                | 0.87-2.02 | 0.20        | 1.22                  | 0.79-1.88 | 0.37        |
| Risk Score (high / low)                            | 1.19                | 1.11-1.28 | <b>0.00</b> | 1.18                  | 1.10-1.27 | <b>0.00</b> |
| <b>TCGA entire cohort</b>                          |                     |           |             |                       |           |             |
| Stage (Stage I & Stage II vs Stage III & Stage IV) | 1.71                | 0.70-4.18 | 0.24        | 1.67                  | 0.68-4.12 | 0.27        |
| Grade (G1 & G2 vs G3)                              | 1.11                | 0.72-1.72 | 0.64        | 1.06                  | 0.68-1.65 | 0.80        |
| Age ( $\leq 60$ vs $> 60$ )                        | 1.31                | 0.98-1.74 | 0.07        | 1.26                  | 0.94-1.68 | 0.12        |
| Risk Score (high / low)                            | 2.05                | 1.67-2.52 | <b>0.00</b> | 1.16                  | 1.09-1.24 | <b>0.00</b> |

Bold values indicate  $P < 0.05$ .

**Table S3: Univariate and multivariate Cox regression analyses of DFS in TCGA training and entire cohort.**

| Variables                                          | Univariate analysis |            |             | Multivariate analysis |            |             |
|----------------------------------------------------|---------------------|------------|-------------|-----------------------|------------|-------------|
|                                                    | HR                  | 95%CI      | <i>p</i>    | HR                    | 95%CI      | <i>p</i>    |
| <b>TCGA training group</b>                         |                     |            |             |                       |            |             |
| Stage (Stage I & Stage II vs Stage III & Stage IV) | 5.11                | 1.26-20.69 | <b>0.02</b> | 4.96                  | 1.21-20.41 | <b>0.03</b> |
| Grade (G1 & G2 vs G3)                              | 1.57                | 0.91-2.72  | 0.11        | 1.18                  | 0.68-2.06  | 0.56        |
| Age ( $\leq 60$ vs $> 60$ )                        | 1.02                | 0.70-1.48  | 0.92        | 1.01                  | 0.68-1.48  | 0.98        |
| Risk Score (high / low)                            | 2.01                | 1.54-2.62  | <b>0.00</b> | 1.98                  | 1.50-2.60  | <b>0.00</b> |
| <b>TCGA entire group</b>                           |                     |            |             |                       |            |             |
| Stage (Stage I & Stage II vs Stage III & Stage IV) | 1.61                | 0.85-3.04  | 0.14        | 1.65                  | 0.87-3.13  | 0.13        |
| Grade (G1 & G2 vs G3)                              | 1.15                | 0.76-1.73  | 0.51        | 1.11                  | 0.73-1.68  | 0.63        |
| Age ( $\leq 60$ vs $> 60$ )                        | 1.24                | 0.95-1.61  | 0.12        | 1.17                  | 0.90-1.53  | 0.25        |
| Risk Score (high / low)                            | 1.67                | 1.37-2.04  | <b>0.00</b> | 1.65                  | 1.34-2.02  | <b>0.00</b> |

Bold values indicate  $P < 0.05$ .
